# Supplementary material
Source: PubMed Central journal article supplement (PMC1449640)

(A)

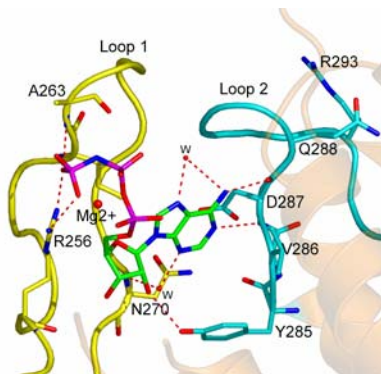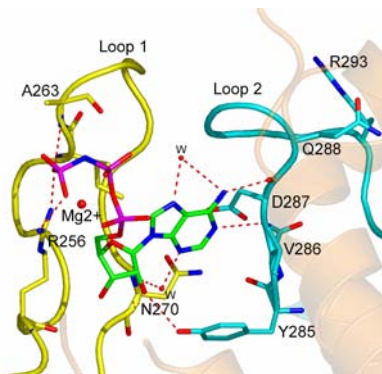

(B)

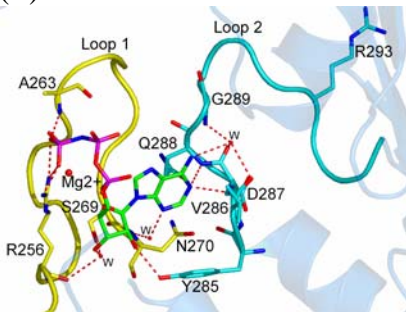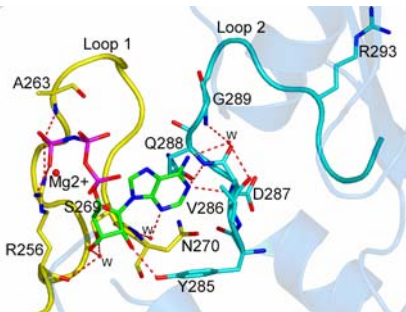

Supplement: pnas_0600440103_1.pdf [file pnas_0600440103_1.pdf]
